# Supplementary material for: Long-term survival after surgical aortic valve replacement among patients over 65 years of age
Source: PubMed Central journal article supplement (PMC4809186; doi:10.1136/openhrt-2015-000338), 2016-03-25
Supplement: openhrt-2015-000338supp_table.pdf [file openhrt-2015-000338supp_table.pdf]

|                                    |          |     |            |          |
|------------------------------------|----------|-----|------------|----------|
| <b>Age</b>                         | 70-79    | 1.8 | (1.4, 2.3) | < 0.0001 |
|                                    | >80      | 2.7 | (1.9, 3.6) | < 0.0001 |
| <b>Left Ventricular Function</b>   |          |     |            |          |
|                                    | Moderate | 1.7 | (0.9, 3.0) | 0.095    |
|                                    | Poor     | 2.5 | (1.1, 5.4) | 0.023    |
| <b>Chronic Kidney Disease</b>      |          | 3.1 | (1.1, 9.1) | 0.035    |
| <b>Chronic Lung Disease</b>        |          | 1.8 | (1.0, 3.2) | 0.058    |
| <b>AVR + CABG</b>                  |          | 1.8 | (1.1, 2.9) | 0.024    |
| <b>Diabetes</b>                    |          | 1.2 | (0.6, 2.0) | 0.546    |
| <b>Anti-Hypertension treatment</b> |          | 1.3 | (0.8, 2.2) | 0.354    |
| <b>Arteriopathy</b>                |          | 2.0 | (0.9, 4.4) | 0.066    |
| <b>Arrhythmia</b>                  |          | 1.9 | (1.1, 3.3) | 0.032    |
| <b>Smoking</b>                     |          |     |            |          |
|                                    | Former   | 1.4 | (0.9, 2.4) | 0.154    |
|                                    | Current  | 0.7 | (0.1, 2.8) | 0.564    |
| <b>Euroscore</b>                   |          | 1.4 | (1.2, 1.5) | < 0.0001 |

**Supplementary Table 1: Univariate Logistic Regression**
